# Supplementary material for: Real time and in situ observation of graphene growth on liquid metal surfaces via a carbon segregation method using high-temperature confocal laser scanning microscopy
Source: Royal Society of Chemistry journal article supplement (doi:10.1039/c6ra22505e), 2016-01-01
Supplement: c6ra22505e1.pdf [file c6ra22505e1.pdf]

**Real time and *in situ* observation of graphene growth on liquid metal surfaces via carbon segregation method using high-temperature confocal laser scanning microscope**

Pengcheng Yan, Yeon Joo Jeong, Mohammad F. Islam\* and P. Chris Pistorius\*

Department of Materials Science and Engineering, Carnegie Mellon University, 5000 Forbes Avenue, Pittsburgh, PA 15213, USA. E-mail: pistorius@cmu.edu, mohammad@cmu.edu

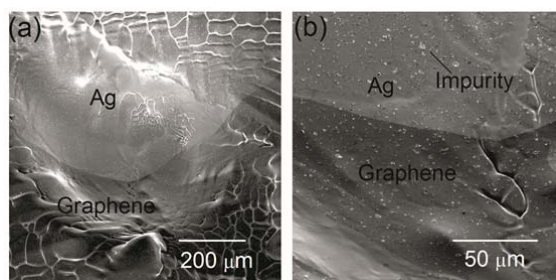

**Fig. S1.** (a-b) High-resolution SEM images show graphene on liquid silver after 5 min of carbon dissolution at  $T_4 = 1200\text{ }^{\circ}\text{C}$  followed by 5 min of growth at  $T_3 = 970\text{ }^{\circ}\text{C}$ .

**Movie S1.** Indication of SLG formation and growth from the motion of oxide particles on liquid copper surface during cooling from  $T_4 = 1300\text{ }^{\circ}\text{C}$  to  $T_3 = 1130\text{ }^{\circ}\text{C}$  captured with a high-temperature CLSM.

**Movie S2.** Formation and growth of MLG islands on liquid copper surface at  $T_3 = 1130\text{ }^{\circ}\text{C}$  observed *in situ* with a high-temperature CLSM.
